# Supplementary material for: Effect of the Most Relevant CYP3A4 and CYP3A5 Polymorphisms on the Pharmacokinetic Parameters of 10 CYP3A Substrates
Source: PubMed Central journal article supplement (PMC7235792; doi:10.3390/biomedicines8040094), 2020-04-22
Supplement: biomedicines-08-00094-s001.pdf [file biomedicines-08-00094-s001.pdf]

**Supplementary table S1.** Pharmacokinetic parameters according to CYP3A genotypes and phenotype in every individual drug included.

| <b>Ambrisentan</b>  |                    |                           |                                    |                      |                      |              |             |
|---------------------|--------------------|---------------------------|------------------------------------|----------------------|----------------------|--------------|-------------|
| Gene                | Genotype/phenotype | AUC/dW<br>(ng·h·Kg/mL·mg) | C <sub>max</sub> /dW (ng·kg/mL·mg) | T <sub>1/2</sub> (h) | T <sub>max</sub> (h) | Cl (L/h·kg)  | Vd (L/kg)   |
| CYP3A4              | Wild-type (n=22)   | 37059.3 (9472.6)          | 5295.7 (832.2)                     | 11.8 (4.4)           | 1.8 (1.0)            | 0.03 (0.01)  | 0.43 (0.13) |
|                     | Mutated (n=1)      | 36619.2                   | 5325.6                             | 16.1                 | 1.5                  | 0.02         | 0.45        |
|                     | p-value            | 0.964                     | 0.972                              | 0.351                | 0.772                | 0.447        | 0.837       |
| CYP3A5              | IM (n=1)           | 45314.2                   | 4754.0                             | 15.8                 | 1.5                  | 0.02         | 0.45        |
|                     | PM (n=22)          | 36664.1 (9291.5)          | 5321.6 (823.3)                     | 11.8 (4.3)           | 1.8 (1.0)            | 0.03 (0.01)  | 0.43 (0.13) |
|                     | p-value            | 0.373                     | 0.508                              | 0.379                | 0.772                | 0.454        | 0.860       |
| <b>Amlodipine</b>   |                    |                           |                                    |                      |                      |              |             |
| Gene                | Genotype/phenotype | AUC/dW<br>(pg·h·Kg/mL·mg) | C <sub>max</sub> /dW (pg·Kg/mL·mg) | T <sub>1/2</sub> (h) | T <sub>max</sub> (h) | Cl (L/h·kg)  | Vd (L/kg)   |
| CYP3A4              | Wild-type (n=23)   | 1909348.9 (377107.5)      | 58670.3 (10990.6)                  | 34.6 (7.0)           | 5.5 (1.8)            | 0.41 (0.11)  | 19.9 (3.0)  |
|                     | Mutated (n=2)      | 2123474.6 (91340.7)       | 60134.8 (5097.6)                   | 40.3 (10.5)          | 5.0 (1.4)            | 0.33 (0.01)  | 19.4 (4.7)  |
|                     | p-value            | 0.440                     | 0.856                              | 0.296                | 0.707                | 0.351        | 0.846       |
| CYP3A5              | NM (n=1)           | 1175122.2                 | 43408.7                            | 24.5                 | 6.0                  | 0.74         | 26.4        |
|                     | IM (n=5)           | 2052800.7 (284277.7)      | 55850.7 (10584.0)                  | 38.5 (8.1)           | 6.6 (2.1)            | 0.36(0.09)   | 19.2 (2.2)  |
|                     | PM (n=19)          | 1932781.4 (353788.7)      | 60369.7 (10306.7)                  | 34.8 (6.7)           | 5.1 (1.7)            | 0.40 (0.09)  | 19.7 (2.9)  |
|                     | p-value            | 0.086                     | 0.240                              | 0.197                | 0.291                | 0.003        | 0.079       |
| <b>Aripiprazole</b> |                    |                           |                                    |                      |                      |              |             |
| Gene                | Genotype/phenotype | AUC/dW<br>(ng·h·Kg/mL·mg) | C <sub>max</sub> /dW (ng·kg/mL·mg) | T <sub>1/2</sub> (h) | T <sub>max</sub> (h) | Cl (mL/h·kg) | Vd (mL·kg)  |
| CYP3A4              | Wild-type (n=25)   | 10148.9 (2535.4)          | 326.5 (95.3)                       | 56.3 (23.9)          | 3.0 (2.3)            | 0.07 (0.03)  | 4.6 (0.9)   |
|                     | Mutated (n=1)      | 13098.4                   | 393.6                              | 79.0                 | 1.0                  | 0.04         | 4.3         |
|                     | p-value            | 0.265                     | 0.497                              | 0.362                | 0.413                | 0.332        | 0.751       |
| CYP3A5              | NM (n=1)           | 11792.4                   | 498.1                              | 65.9                 | 2.0                  | 0.04         | 4.4         |

|           |                  |              |             |           |             |           |
|-----------|------------------|--------------|-------------|-----------|-------------|-----------|
| IM (n=4)  | 10603.1 (1550.0) | 377.4 (68.0) | 58.5 (23.6) | 1.5 (0.4) | 0.06 (0.02) | 4.5 (0.2) |
| PM (n=21) | 10124.6 (2758.9) | 311.8 (90.7) | 56.5 (24.9) | 3.2 (2.4) | 0.07 (0.03) | 4.6 (1.0) |
| p-value   | 0.795            | 0.078        | 0.928       | 0.386     | 0.704       | 0.954     |

#### Donepezil

| Gene   | Genotype/phenotype | AUC/dW<br>(pg·h·Kg/mL·mg) | C <sub>max</sub> /dW (pg·Kg/mL·mg) | T <sub>1/2</sub> (h) | T <sub>max</sub> (h) | Cl (L/h·kg) | Vd (L/kg)  |
|--------|--------------------|---------------------------|------------------------------------|----------------------|----------------------|-------------|------------|
| CYP3A4 | Wild-type (n=21)   | 3045037.2 (531336.9)      | 126941.9 (30473.0)                 | 44.0 (16.0)          | 2.2 (1.0)            | 0.24 (0.06) | 14.0 (2.6) |
|        | Mutated (n=2)      | 2717340.1 (246516.0)      | 141017.6 (14280.3)                 | 38.3 (0.4)           | 2.0 (0.0)            | 0.27 (0.03) | 14.9 (1.8) |
|        | p-value            | 0.405                     | 0.532                              | 0.631                | 0.762                | 0.503       | 0.631      |
| CYP3A5 | NM (n=1)           | 2105891.8                 | 82787.2                            | 35.8                 | 2.0                  | 0.35        | 18.0       |
|        | IM (n=6)           | 3171300.6 (609051.7)      | 141307.2 (27436.9)                 | 51.0 (20.3)          | 1.8 (0.40)           | 0.21 (0.07) | 14.3 (2.9) |
|        | PM (n=16)          | 3015422.9 (452807.3)      | 126074.0 (28528.9)                 | 41.2 (13.3)          | 2.3 (1.1)            | 0.24 (0.06) | 13.7 (2.4) |
|        | p-value            | 0.165                     | 0.164                              | 0.381                | 0.525                | 0.117       | 0.264      |

#### Atorvastatin

| Gene   | Genotype/phenotype | AUC/dW<br>(ng·h·Kg/mL·mg) | C <sub>max</sub> /dW (ng·kg/mL·mg) | T <sub>1/2</sub> (h) | T <sub>max</sub> (h) | Cl (L/h·kg) | Vd (L/kg)    |
|--------|--------------------|---------------------------|------------------------------------|----------------------|----------------------|-------------|--------------|
| CYP3A4 | Wild-type (n=44)   | 135931.4 (70279.7)        | 39656.5 (32807.8)                  | 8.7 (2.5)            | 1.7 (1.2)            | 8.6 (2.8)   | 108.5 (49.7) |
|        | Mutated (n=6)      | 115568.0 (33782.7)        | 22946.6 (7334.4)                   | 8.5 (1.6)            | 1.2 (0.5)            | 9.2 (3.0)   | 114.1 (40.8) |
|        | p-value            | 0.491                     | 0.224                              | 0.879                | 0.312                | 0.625       | 0.792        |
| CYP3A5 | NM (n=1)           | 167855.0                  | 40372.5                            | 8.0                  | 0.7                  | 5.9         | 67.6         |
|        | IM (n=5)           | 161978.3 (99720.8)        | 48787.7 (65431.8)                  | 9.9 (3.3)            | 2.1 (2.2)            | 7.9 (4.1)   | 110.9 (55.1) |
|        | PM (n=44)          | 129469.2 (63713.7)        | 36324.0(26499.6)                   | 8.5 (2.3)            | 1.6 (1.0)            | 8.8 (2.7)   | 109.9 (48.4) |
|        | p-value            | 0.525                     | 0.706                              | 0.465                | 0.514                | 0.483       | 0.694        |

#### Fentanyl

| Gene   | Genotype/phenotype | AUC/dW<br>(pg·h·Kg/mL·mg) | C <sub>max</sub> /dW (pg·Kg/mL·mg) | T <sub>1/2</sub> (h) | T <sub>max</sub> (h) | Cl (L/h·kg) | Vd (L/kg)   |
|--------|--------------------|---------------------------|------------------------------------|----------------------|----------------------|-------------|-------------|
| CYP3A4 | Wild-type (n=33)   | 736.7 (377.2)             | 142.7 (44.6)                       | 13.5 (6.0)           | 1.0 (0.4)            | 15.3 (0.8)  | 25.0 (11.6) |

|        |               |               |              |            |           |             |             |
|--------|---------------|---------------|--------------|------------|-----------|-------------|-------------|
|        | Mutated (n=2) | 1098.9 (87.9) | 181.8 (14.4) | 15.0 (3.1) | 1.1 (0.2) | 7.7 (1.0)   | 16.5 (1.3)  |
|        | p-value       | 0.190         | 0.232        | 0.728      | 0.756     | 0.216       | 0.314       |
| CYP3A5 | IM (n=5)      | 659.0 (293.2) | 134.8 (40.2) | 12.4 (8.7) | 1.0 (0.3) | 16.8 (10.2) | 20.8 (6.0)  |
|        | PM (n=44)     | 773.8 (389.9) | 146.7 (45.4) | 13.7 (5.4) | 1.0 (0.4) | 14.5 (8.1)  | 25.2 (12.1) |
|        | p-value       | 0.535         | 0.588        | 0.641      | 0.676     | 0.575       | 0.440       |

#### Fesoterodine

| Gene   | Genotype/phenotype | AUC/dW<br>(ng·h·Kg/mL·mg) | C <sub>max</sub> /dW <sub>(ng·Kg/mL·mg)</sub> | T <sub>1/2</sub> (h) | T <sub>max</sub> (h) | Cl (L/h·kg) | Vd (L/kg)   |
|--------|--------------------|---------------------------|-----------------------------------------------|----------------------|----------------------|-------------|-------------|
| CYP3A4 | Wild-type (n=12)   | 608.6 (225.9)             | 60.6 (18.0)                                   | 8.3 (2.4)            | 5.6 (0.7)            | 1.9 (0.8)   | 23.0 (14.3) |
|        | Mutated (n=1)      | 298.3                     | 30.4                                          | 7.1                  | 6.0                  | 3.3         | 34.5        |
|        | p-value            | 0.214                     | 0.135                                         | 0.650                | 0.637                | 0.119       | 0.457       |
| CYP3A5 | PM (n=13)          | 584.8 (232.8)             | 58.3 (19.1)                                   | 8.2 (2.3)            | 5.6 (0.7)            | 2.0 (0.9)   | 23.9 (14.0) |

#### Imatinib

| Gene   | Genotype/phenotype | AUC/dW<br>(ng·h·Kg/mL·mg) | C <sub>max</sub> /dW <sub>(ng·kg/mL·mg)</sub> | T <sub>1/2</sub> (h) | T <sub>max</sub> (h) | Cl (L/h·kg) | Vd (L/kg) |
|--------|--------------------|---------------------------|-----------------------------------------------|----------------------|----------------------|-------------|-----------|
| CYP3A4 | Wild-type (n=11)   | 6077.5 (1303.6)           | 392.0 (79.7)                                  | 12.3 (1.7)           | 3.4 (1.3)            | 0.17 (0.04) | 2.9 (0.5) |
|        | Mutated (n=1)      | 9183.9                    | 555.8                                         | 16.0                 | 1.5                  | 0.10        | 2.4       |
|        | p-value            | 0.046                     | 0.077                                         | 0.072                | 0.196                | 0.148       | 0.321     |
| CYP3A5 | IM (n=1)           | 8178.3                    | 438.0                                         | 16.1                 | 3.0                  | 0.11        | 2.7       |
|        | PM (n=11)          | 6168.9 (1487.9)           | 402.7 (93.3)                                  | 12.3 (1.7)           | 3.22 (1.4)           | 0.17 (0.04) | 2.9 (0.5) |
|        | p-value            | 0.225                     | 0.724                                         | 0.060                | 0.880                | 0.271       | 0.753     |

#### Olanzapine

| Gene   | Genotype/phenotype | AUC/dW<br>(pg·h·Kg/mL·mg) | C <sub>max</sub> /dW <sub>(pg·Kg/mL·mg)</sub> | T <sub>1/2</sub> (h) | T <sub>max</sub> (h) | Cl (L/h·kg) | Vd (L/kg)     |
|--------|--------------------|---------------------------|-----------------------------------------------|----------------------|----------------------|-------------|---------------|
| CYP3A4 | Wild-type (n=25)   | 2974478.5 (569795.8)      | 103677.2 (26770.0)                            | 32.3 (9.3)           | 4.4 (2.3)            | 0.27 (0.06) | 859.2 (207.2) |
| CYP3A5 | NM (n=1)           | 2322306.8                 | 107603.6                                      | 23.9                 | 2.5                  | 0.38        | 13.0          |
|        | IM (n=12)          | 3022146.2 (499342.1)      | 101261.4 (24583.9)                            | 32.3 (6.9)           | 4.4 (1.9)            | 0.26 (0.05) | 12.0 (2.1)    |

|            | PM (n=12)          | 2981158.5 (646396.8)      | 105765.9 (30767.9)                            | 33.0 (11.7)          | 4.6 (2.7)            | 0.27 (0.07) | 12.5 (3.1)  |
|------------|--------------------|---------------------------|-----------------------------------------------|----------------------|----------------------|-------------|-------------|
|            | p-value            | 0.517                     | 0.915                                         | 0.668                | 0.704                | 0.248       | 0.880       |
| Quetiapine |                    |                           |                                               |                      |                      |             |             |
| Gene       | Genotype/phenotype | AUC/dW<br>(ng·h·Kg/mL·mg) | C <sub>max</sub> /dW <sub>(ng·kg/mL·mg)</sub> | T <sub>1/2</sub> (h) | T <sub>max</sub> (h) | Cl (L/h·kg) | Vd (L/kg)   |
| CYP3A4     | Wild-type (n=17)   | 588.9 (272.6)             | 199.4 (106.3)                                 | 4.8 (1.1)            | 1.2 (1.1)            | 2.1 (1.1)   | 14.2 (8.6)  |
|            | Mutated (n=2)      | 1107.7 (376.1)            | 334.1 (92.0)                                  | 4.5 (0.8)            | 2.2 (2.5)            | 0.9 (0.3)   | 6.2 (3.1)   |
|            | p-value            | 0.024                     | 0.106                                         | 0.668                | 0.305                | 0.173       | 0.218       |
| CYP3A5     | IM (n=6)           | 548.5 (211.0)             | 203.9 (78.0)                                  | 4.2 (1.5)            | 0.7 (0.2)            | 2.1 (1.1)   | 11.3 (3.4)  |
|            | PM (n=13)          | 687.4 (354.7)             | 218.0 (126.0)                                 | 5.1 (0.8)            | 1.6 (1.4)            | 1.9 (1.2)   | 14.4 (10.0) |
|            | p-value            | 0.390                     | 0.806                                         | 0.112                | 0.135                | 0.737       | 0.482       |

Abbreviation: AUC, area under the curve; C<sub>max</sub>, maximum plasma concentration; T<sub>max</sub>, time to reach the maximum plasma concentration; T<sub>1/2</sub>, half-life; Cl, total drug clearance adjusted for bioavailability; Vd, volume of distribution adjusted for bioavailability; CYP, cytochrome p450 oxidase; dW, corrected by dose/weight.
